# Supplementary material for: Engineered Bacteriorhodopsin May Induce Lung Cancer Cell Cycle Arrest and Suppress Their Proliferation and Migration
Source: MDPI journal article supplement (doi:10.3390/molecules26237344), 2021-12-03
Supplement: s1 [file s1]

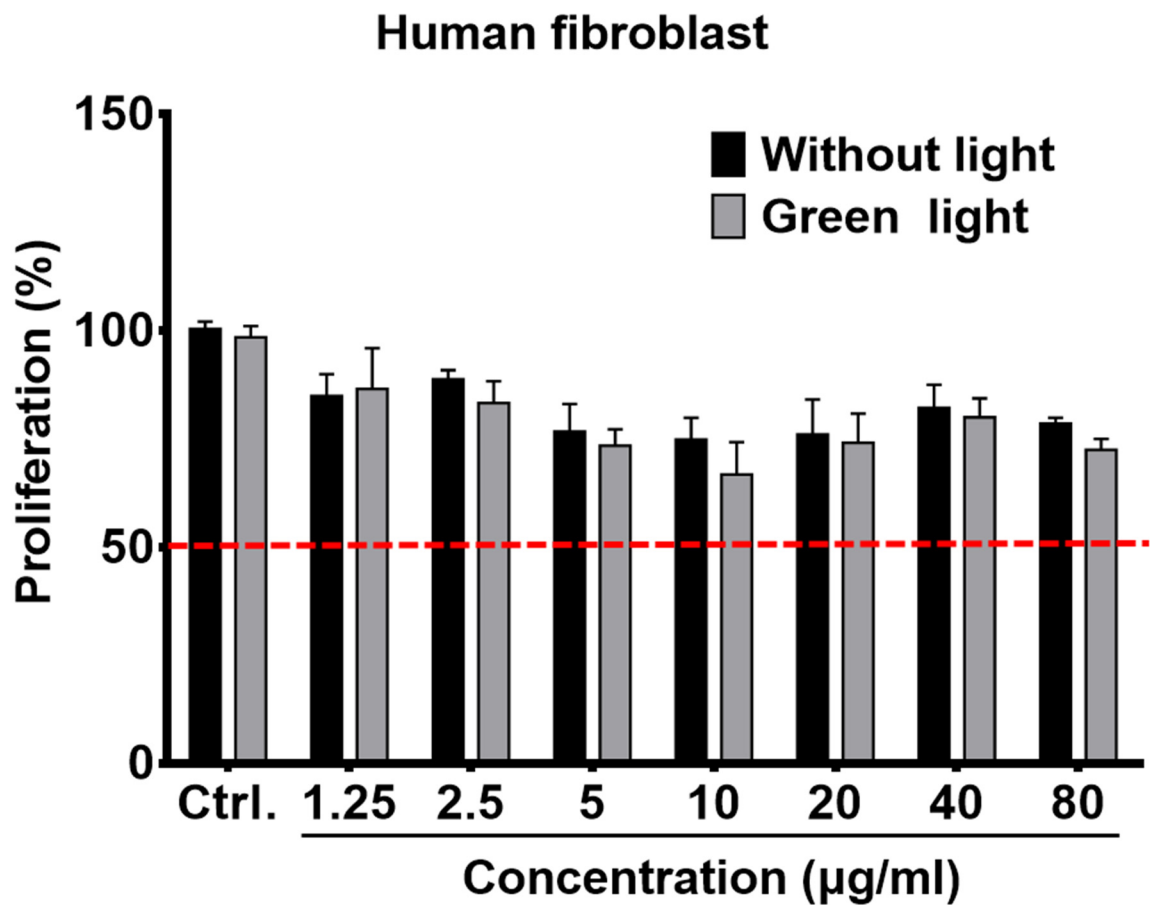

**Figure S1. Cell proliferation of human fibroblasts after treatment with HEBR protein for 48 h.** The data were expressed as the relative proliferation of cells by the CCK-8 assay. The human fibroblast viability was only slightly affected by the treatment of HEBR protein (80 µg/ml) either with or without green light illumination.
